# Supplementary material for: Pontederia crassipes inspired bottom overflow for fast and stable drainage
Source: Royal Society of Chemistry journal article supplement (doi:10.1039/d3sm01013a), 2023-10-27
Supplement: d3sm01013a4.pdf [file d3sm01013a4.pdf]

Supporting Information for

***Pontederia crassipes* inspired bottom overflow for fast and stable drainage**

Can Gao,<sup>ab</sup> Chengqi Zhang,<sup>a</sup> Shijie Liu,<sup>ab</sup> Cunlong Yu,<sup>a</sup> Lei Jiang,<sup>\*ab</sup> and Zhichao Dong<sup>\*ab</sup>

<sup>a</sup>CAS Key Laboratory of Bio-inspired Materials and Interfacial Science, Technical Institute of Physics and Chemistry, Chinese Academy of Sciences, Beijing 100190, P. R. China.

<sup>b</sup>School of Future Technology, University of Chinese Academy of Sciences, Beijing 100049, P. R. China.

\*Corresponding author

E-mail: dongzhichao@mail.ipc.ac.cn; jianglei@iccas.ac.cn

**This PDF file includes:**

Scheme S1

Figs. S1-S15

Captions for Movies S1 to S4

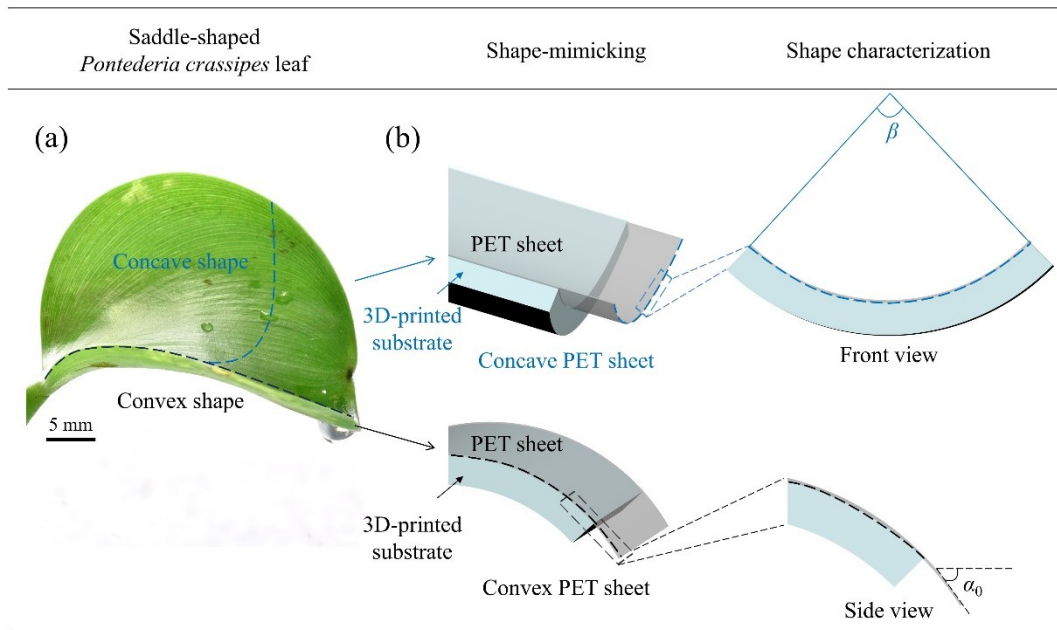

**Scheme S1. Biomimetic design inspired by the saddle shape of the *Pontederia crassipes* leaf.** (a) *Pontederia crassipes* leaf shows a saddle shape. (b) Schematic diagrams of the shape-mimicking.

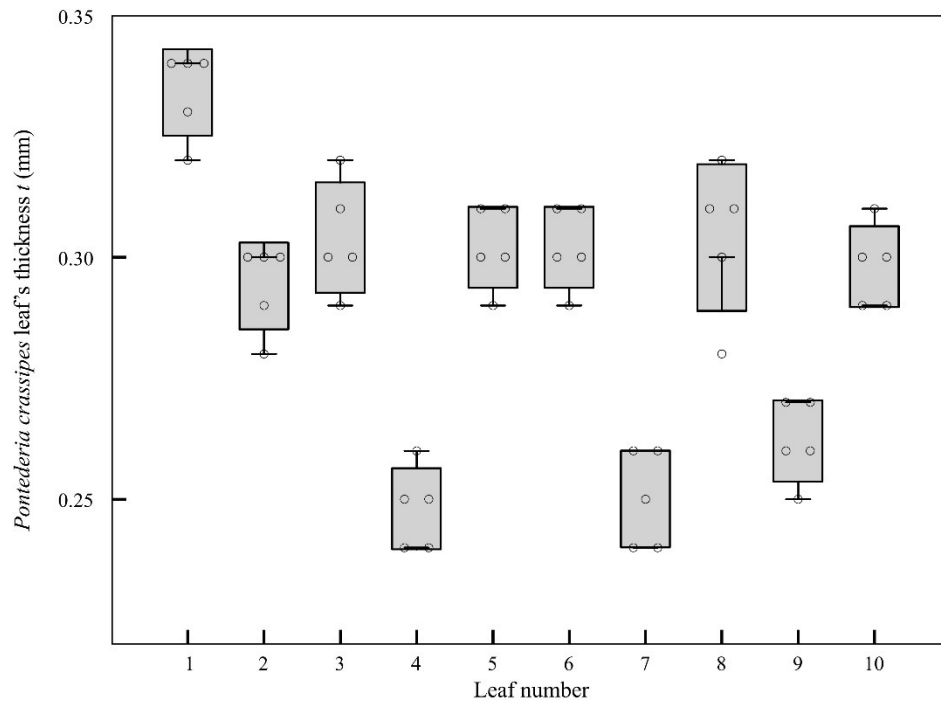

**Fig. S1. Thickness distribution of *Pontederia crassipes* leaf.** Ten leaves with five positions in every leaf are chosen to count the thickness. The error bars are the  $\pm$  SD ( $n = 5$ ).

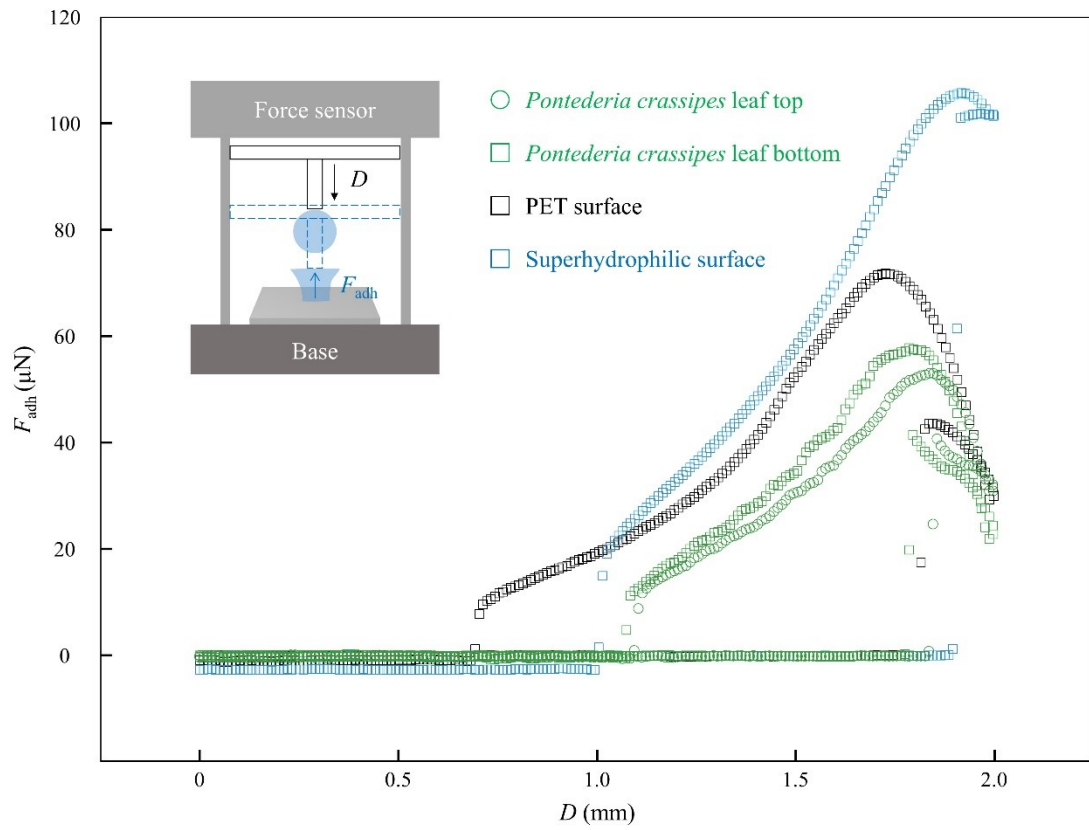

**Fig. S2. Adhesion forces of different surfaces with water.** Adhesion forces  $F_{adh}$  of top and bottom surfaces of *Pontederia crassipes* leaf, PET surface, and superhydrophilic surface with water, respectively.

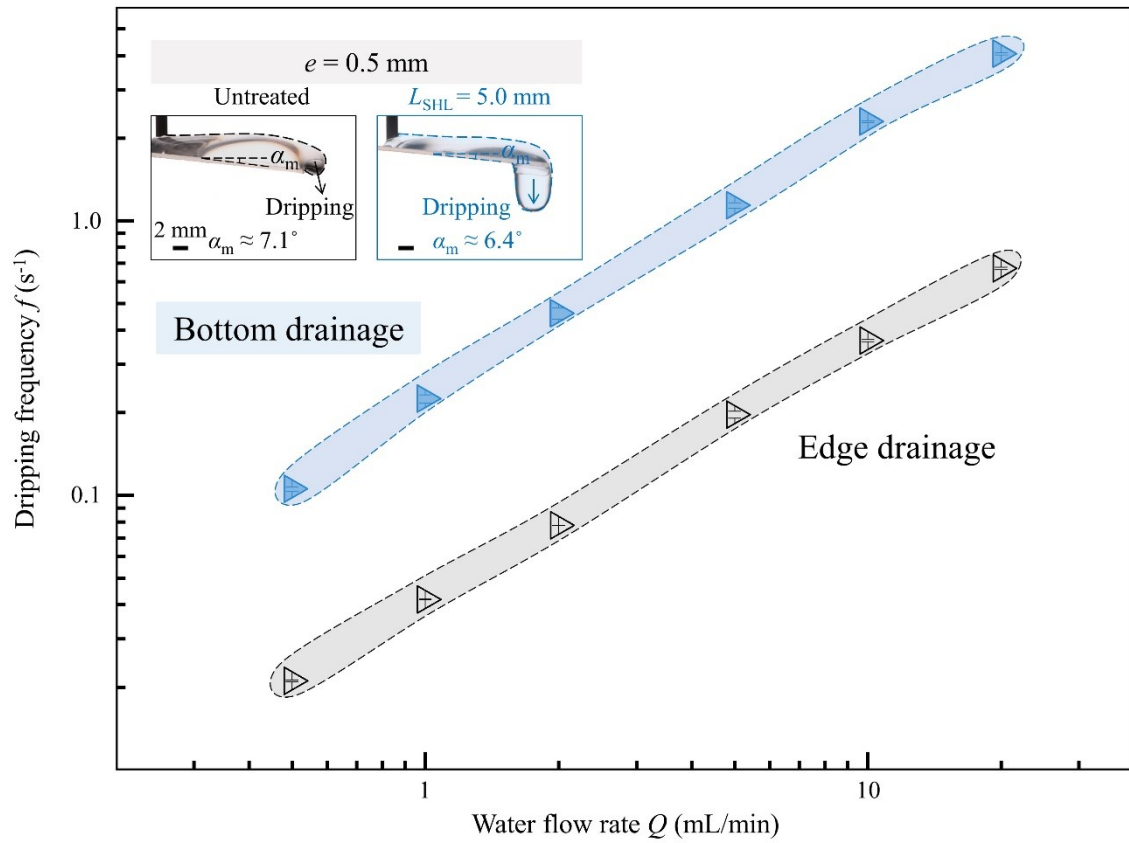

**Fig. S3. Dripping frequency versus water flow rate for PET sheets with thickness  $e = 0.5 \text{ mm}$  of untreated one and treated one with  $L_{\text{SHL}} = 5.0 \text{ mm}$ .**

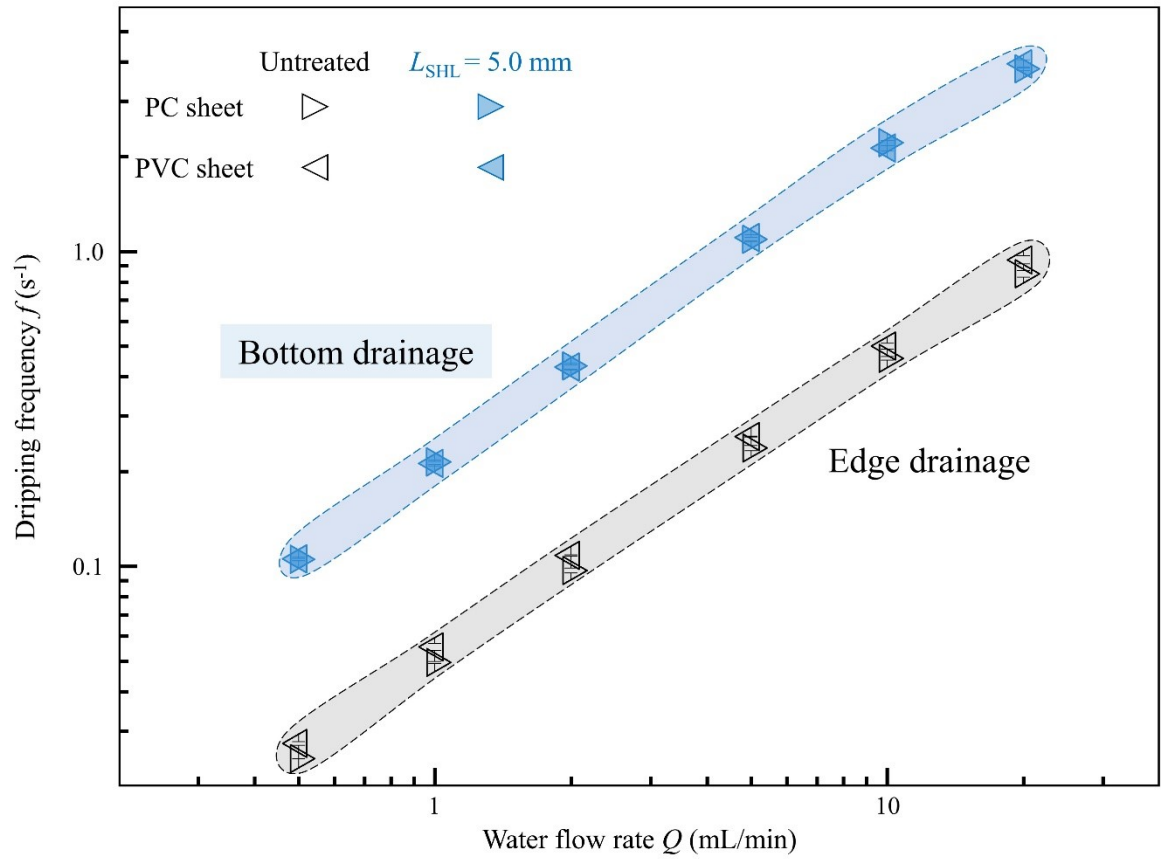

**Fig. S4. Dripping frequency versus water flow rate for PVC and PC sheets of untreated ones and treated ones with  $L_{SHL} = 5.0$  mm.**

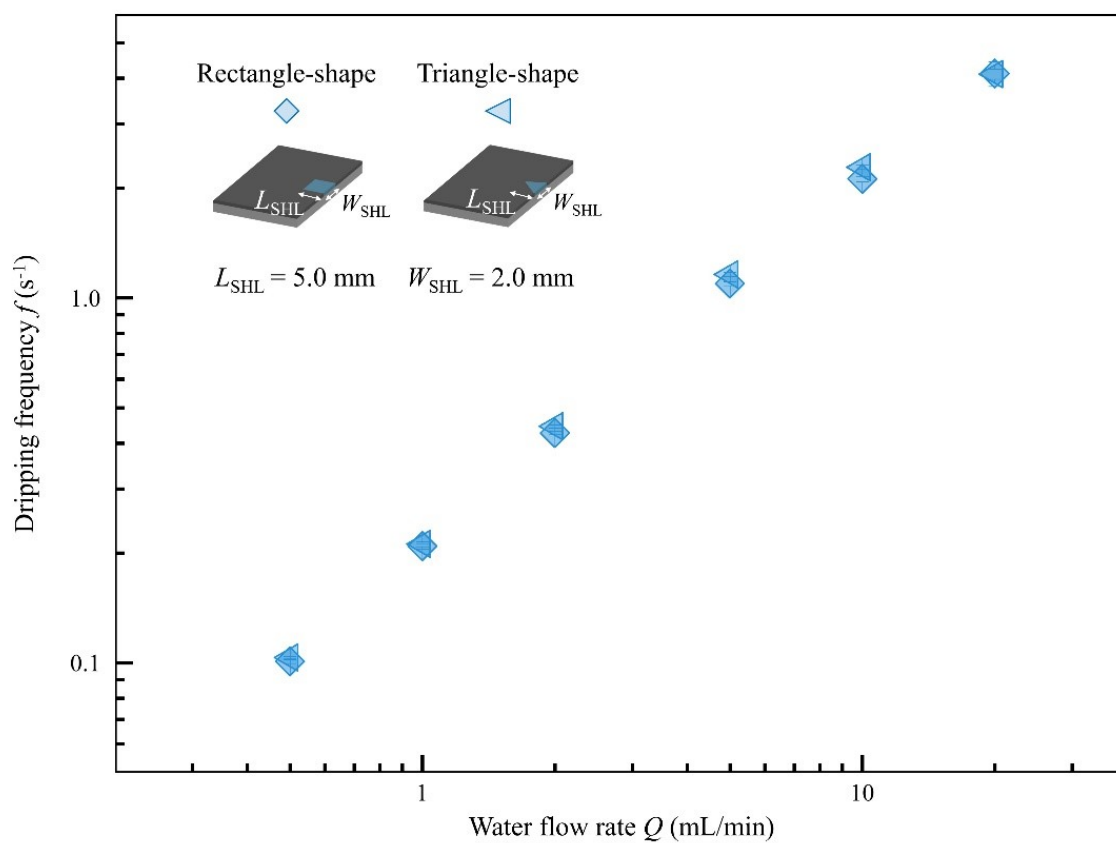

**Fig. S5. Comparison of dripping frequency versus water flow rate of PET sheets with treated rectangle- and triangle-shape superhydrophilic zone. The two zones possess the same superhydrophilic length  $L_{\text{SHL}}$  of 5.0 mm and  $W_{\text{SHL}}$  of 2.0 mm.**

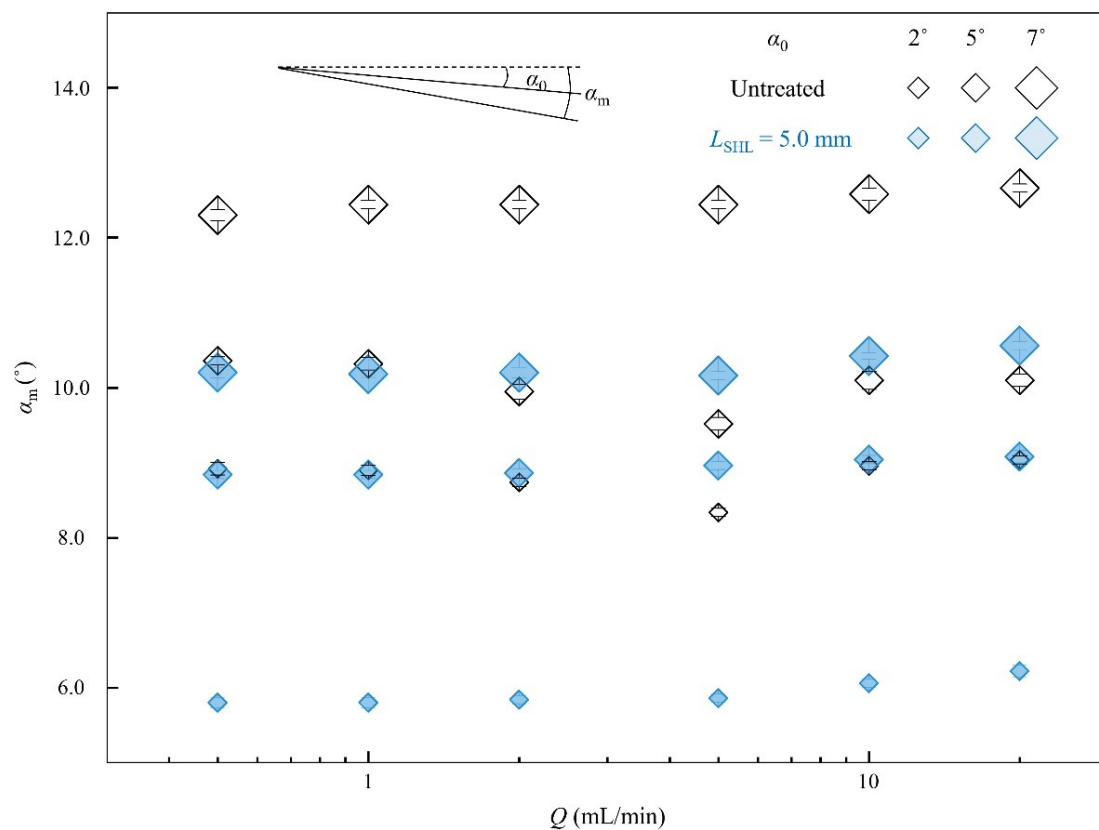

**Fig. S6.** The maximum dripping angles  $\alpha_m$  versus water flow rates  $Q$  for the untreated PET and PET with bottom  $L_{SHL} = 5.0$  mm treatment at different  $\alpha_0$ . All error bars are the  $\pm$  SD ( $n = 5$ ) and they are smaller than the symbols.



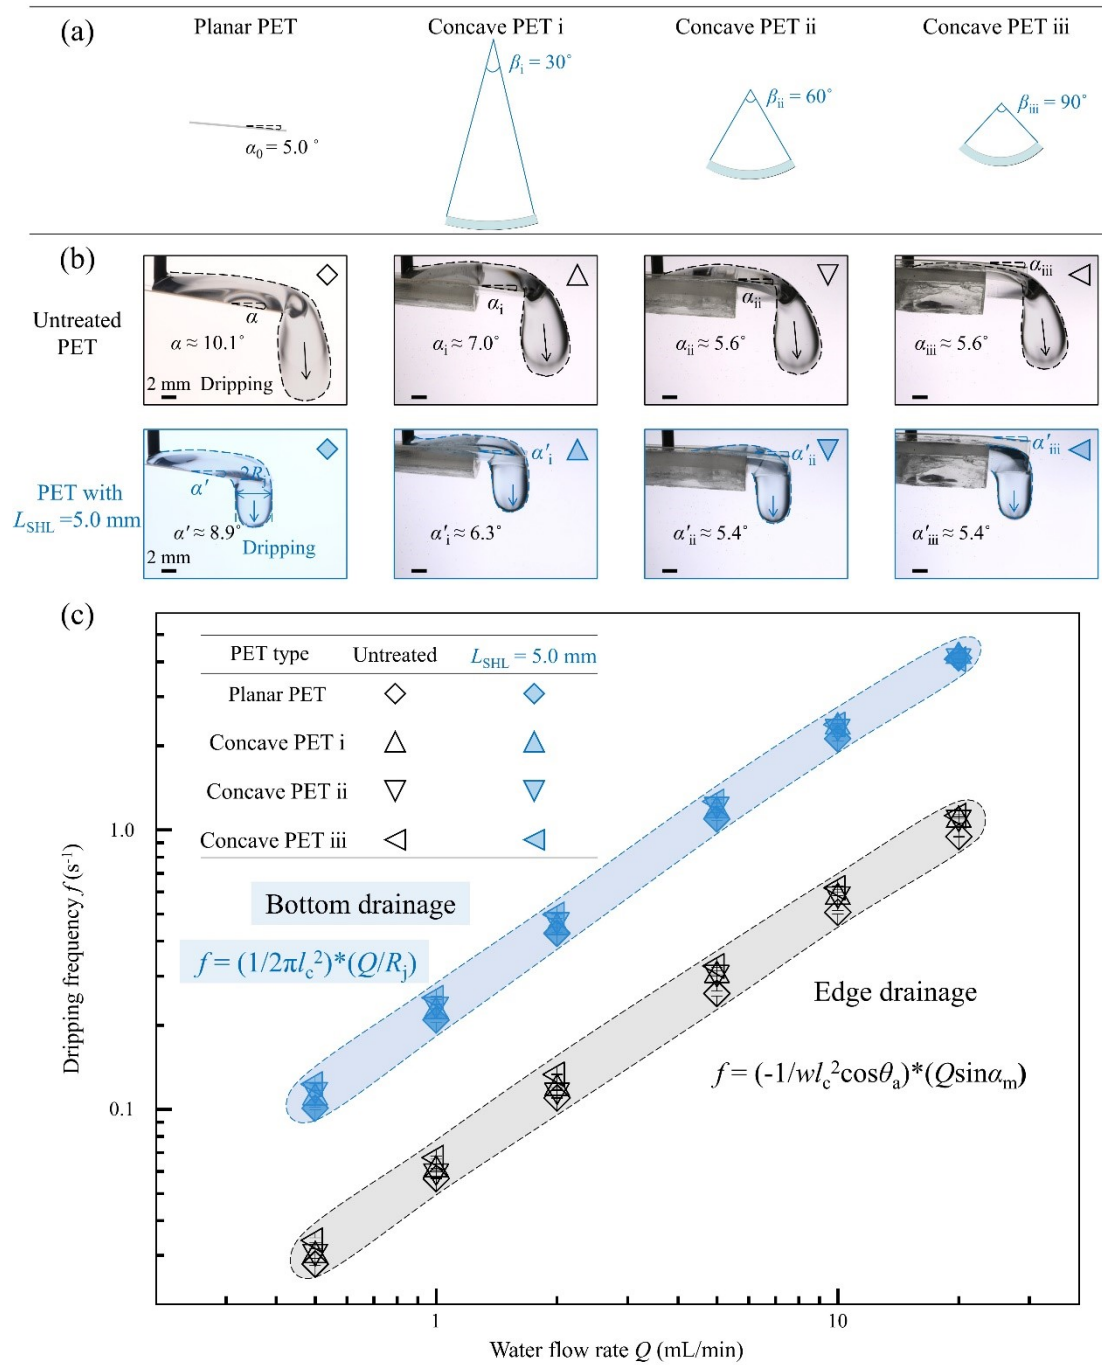

**Fig. S7. Drainage frequency comparisons of the planar and concave PET sheets.** (a) Schematic diagrams of planar and concave PET sheets. (b-c) Selected critical dripping snapshots (b) and drainage frequency versus water flow rates (c) for PET sheets with different shapes of untreated ones and treated ones with  $L_{SHL} = 5.0$  mm.

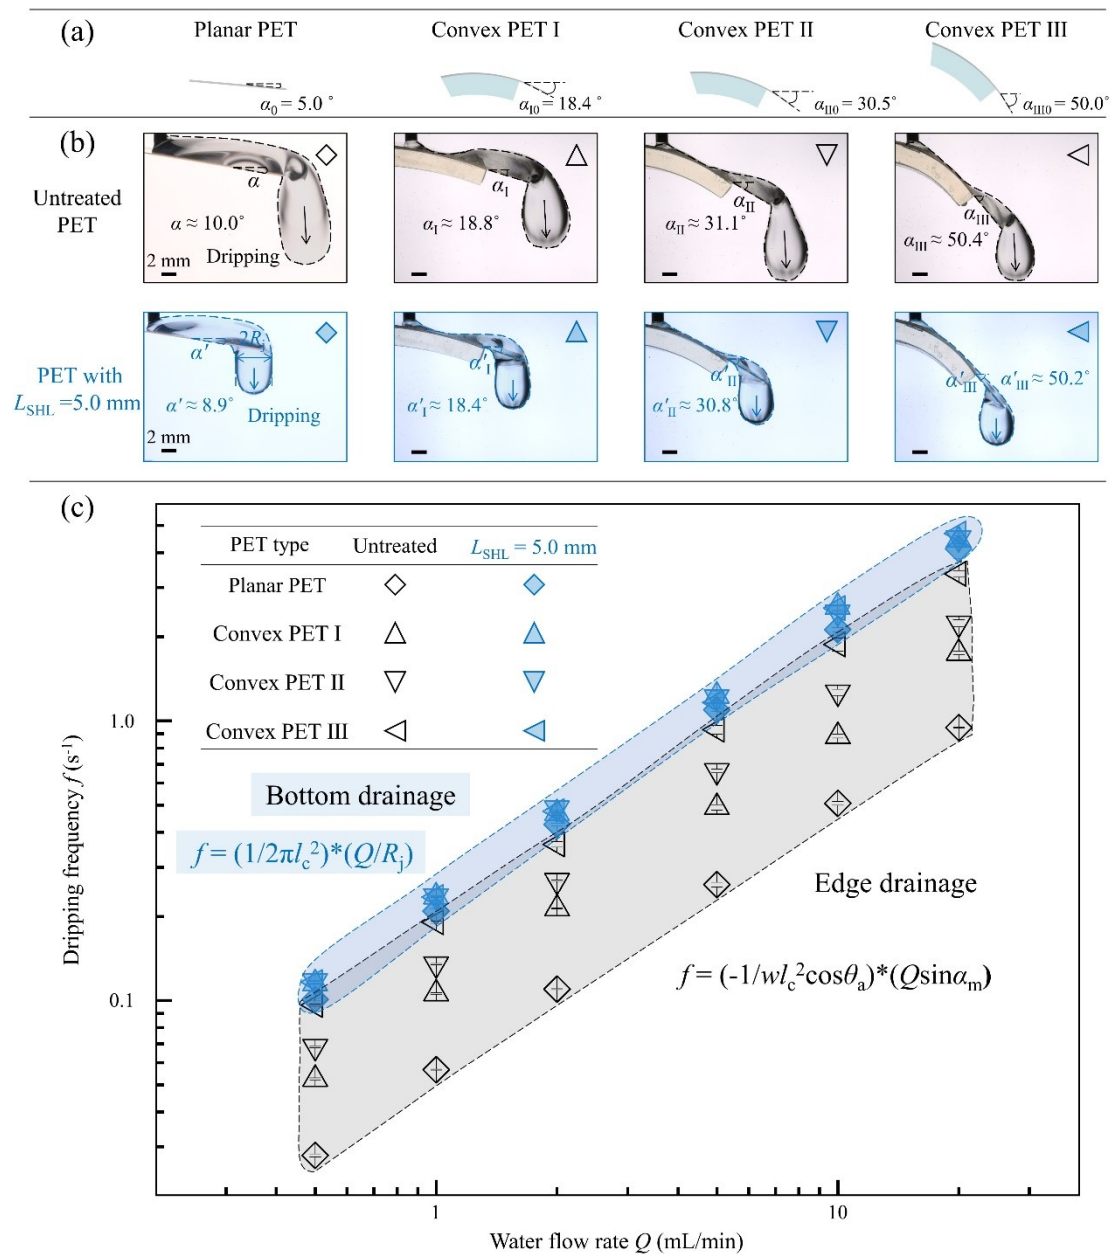

**Fig. S8. Drainage result comparisons of planar and convex PET sheets.** (a) Schematic diagrams of planar and convex PET sheets. (b-c) Selected critical dripping snapshots (b) and drainage frequency versus water flow rates (c) for PET sheets with different shapes of untreated ones and treated ones with  $L_{\text{SHL}} = 5.0 \text{ mm}$ .

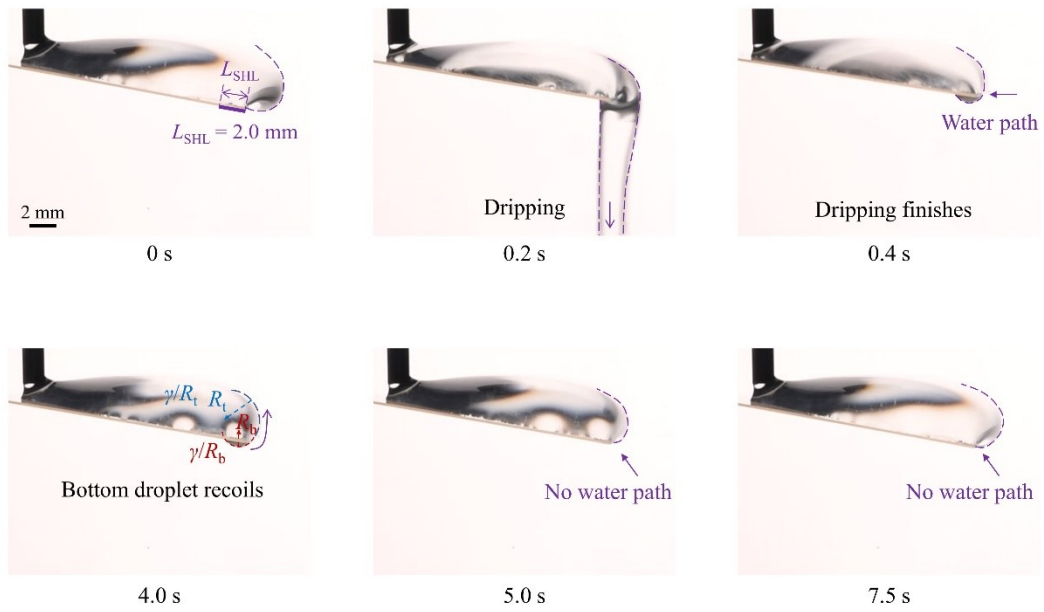

**Fig. S9. One drainage process for PET sheet with bottom  $L_{SHL} = 2.0$  mm.** The smaller bottom droplet recoils back to the top due to the local pressure gradient ( $\gamma/R_b - \gamma/R_t$ ) and no water path exists after the dripping.

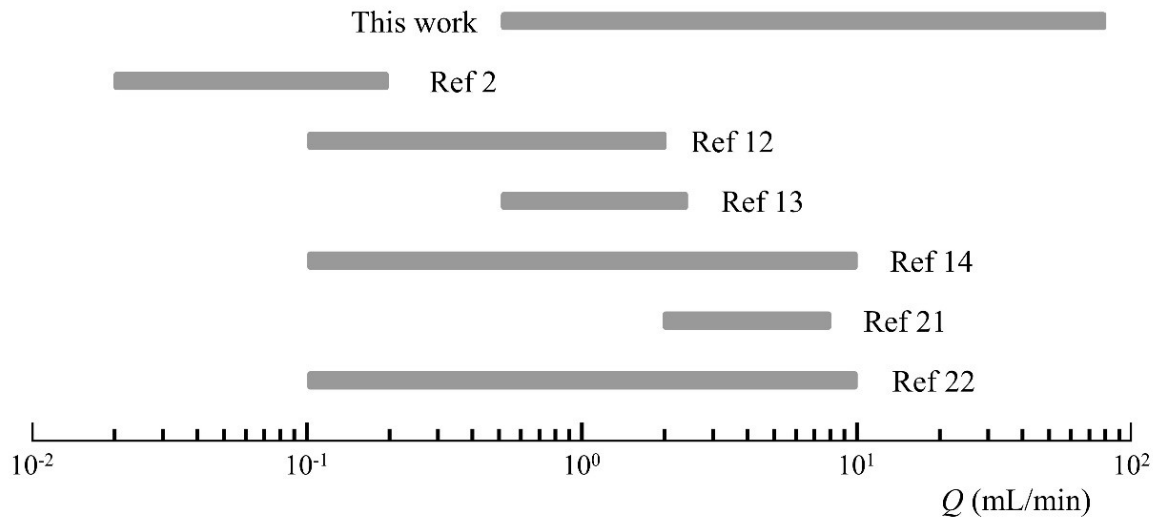

**Fig. S10. Comparison of drainage efficiency in this work with other drainage strategies.**

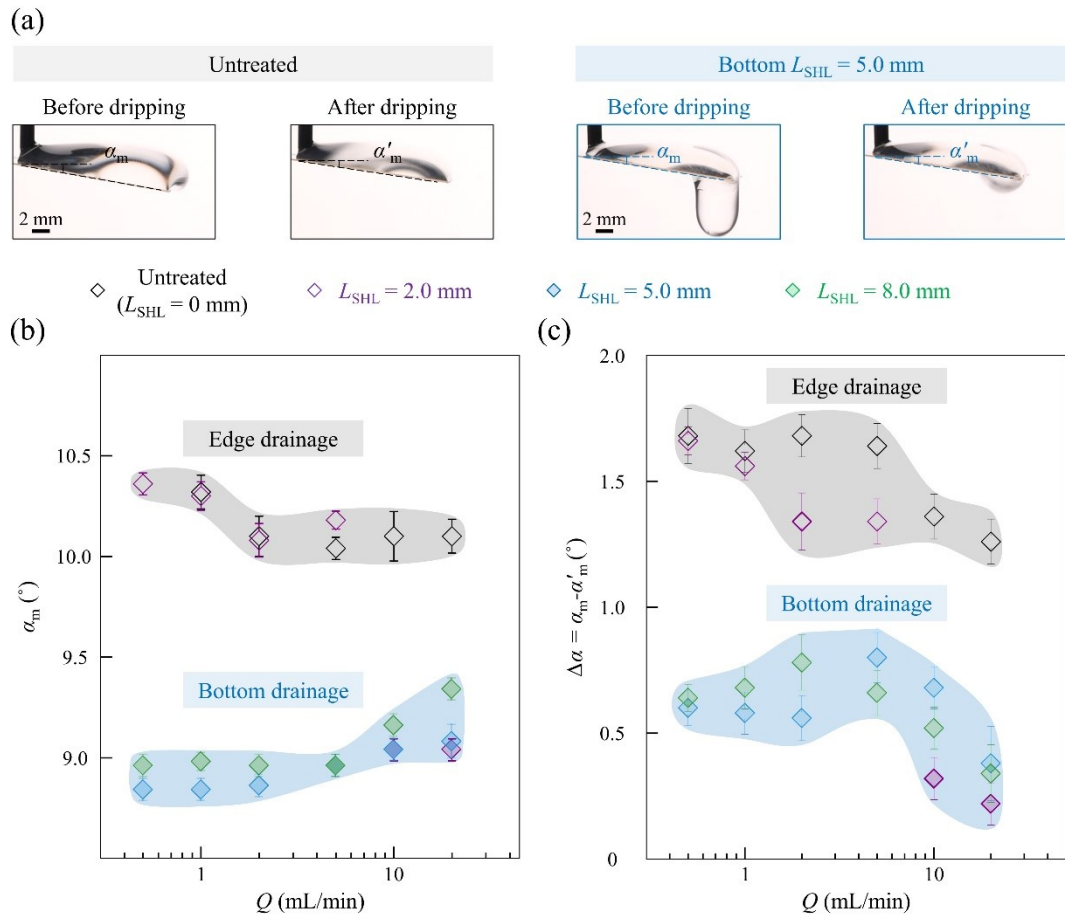

**Fig. S11. Dripping angle comparisons of PET sheets.** (a) Selected snapshots before and after dripping for the untreated PET and PET with bottom  $L_{\text{SHL}} = 5.0 \text{ mm}$  treatment. We define the dripping angle deviation  $\Delta\alpha = \alpha_m - \alpha'_m$ . Here,  $\alpha_m$  represents the maximum dripping angle before dripping and  $\alpha'_m$  represents the dripping angle after dripping. (b and c) The maximum dripping angle  $\alpha_m$  (b) and dripping angle deviation  $\Delta\alpha$  (c) versus water flow rates  $Q$  for PET sheets with different bottom  $L_{\text{SHL}}$  treatments. All error bars are the  $\pm$  SD ( $n = 5$ ).

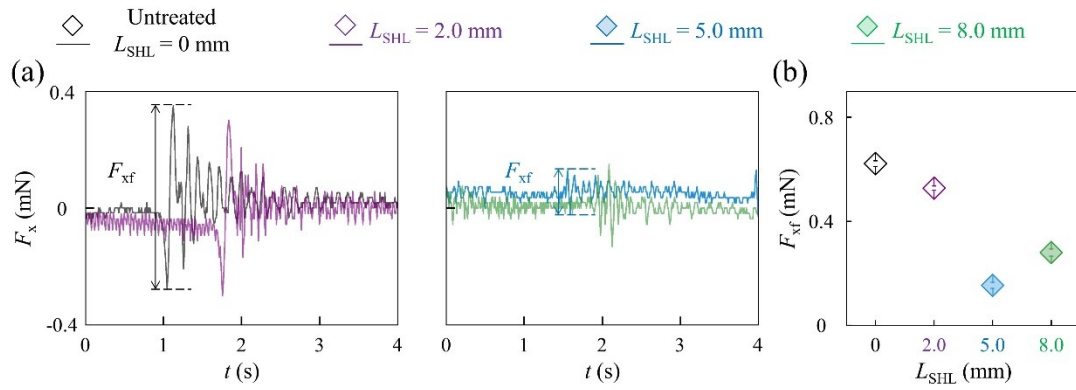

**Fig. S12. Horizontal force  $F_x$  comparisons of PET sheets.** (a) Horizontal force  $F_x$  versus time after one dripping for PET sheets with different bottom  $L_{SHL}$  treatments at  $Q = 2.0$  mL/min. (b) The maximum force amplitudes  $F_{xf}$  versus PET sheets with different bottom  $L_{SHL}$  treatments. All error bars are the  $\pm$  SD ( $n = 5$ ) and they are smaller than the symbols.

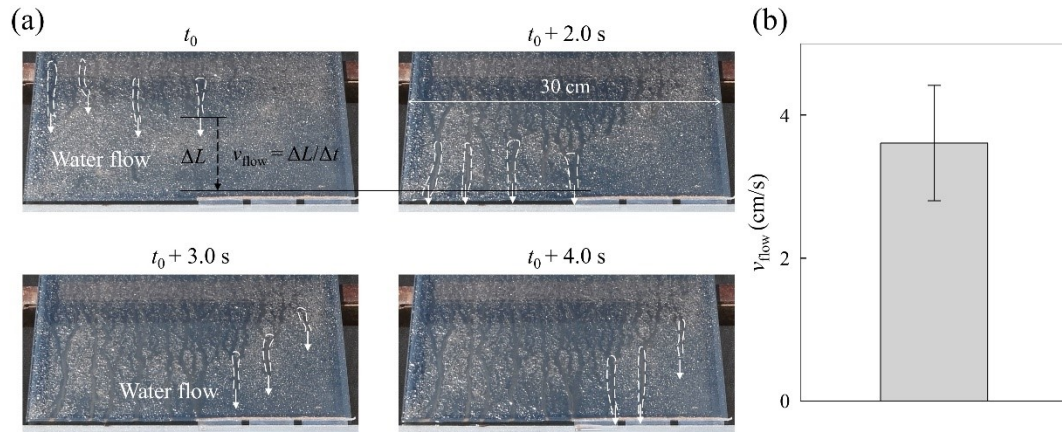

**Fig. S13. Water flow speed characterizations.** (a) Selected snapshots demonstrates water flows gradually flow downwards. Water flow speed can be express as  $v_{\text{flow}} = \Delta L/\Delta t$ . (b) Calculated results of water flow speed  $v_{\text{flow}}$ .

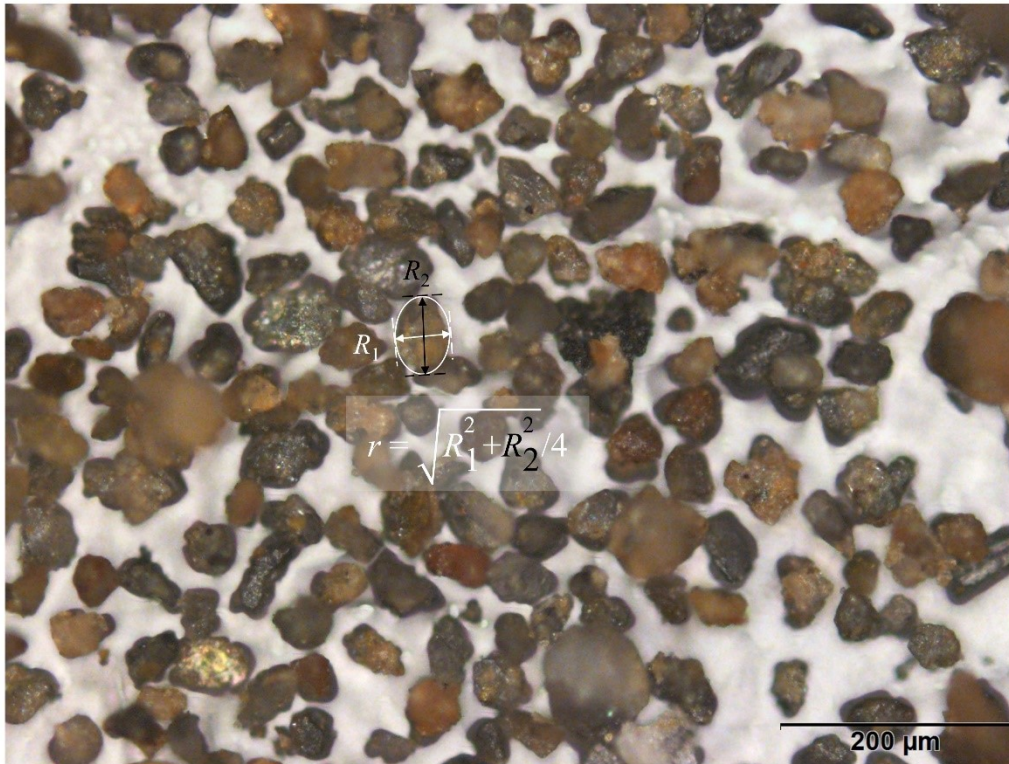

**Fig. S14. Microphotograph of dust particles characterizes their sizes.**



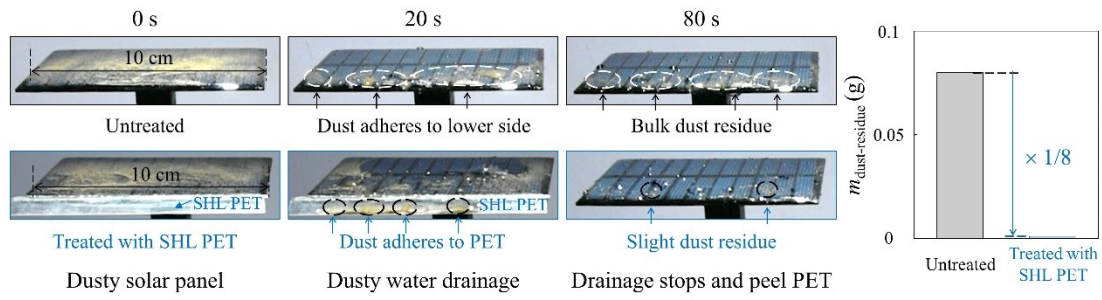

**Fig. S15. Dedusting demonstration for solar panels.** (a) Selected snapshots of the dedusting process for untreated solar panel and treated solar panel with a superhydrophilic PET sheet of 10 cm x 1 cm, respectively. (b) Dust residue mass characterizations.

**Movie S1.** Two drainage models for *Pontederia crassipes* leaf.

**Movie S2.** Comparisons of the two drainage models.

**Movie S3.** Drainage planes under realistic rainfall environment.

**Movie S4.** Dusty water drainage on various materials.
